# Supplementary material
Source: PubMed Central journal article supplement (PMC5774979)

Supplementary Figure: Uncropped scans with size marker indications

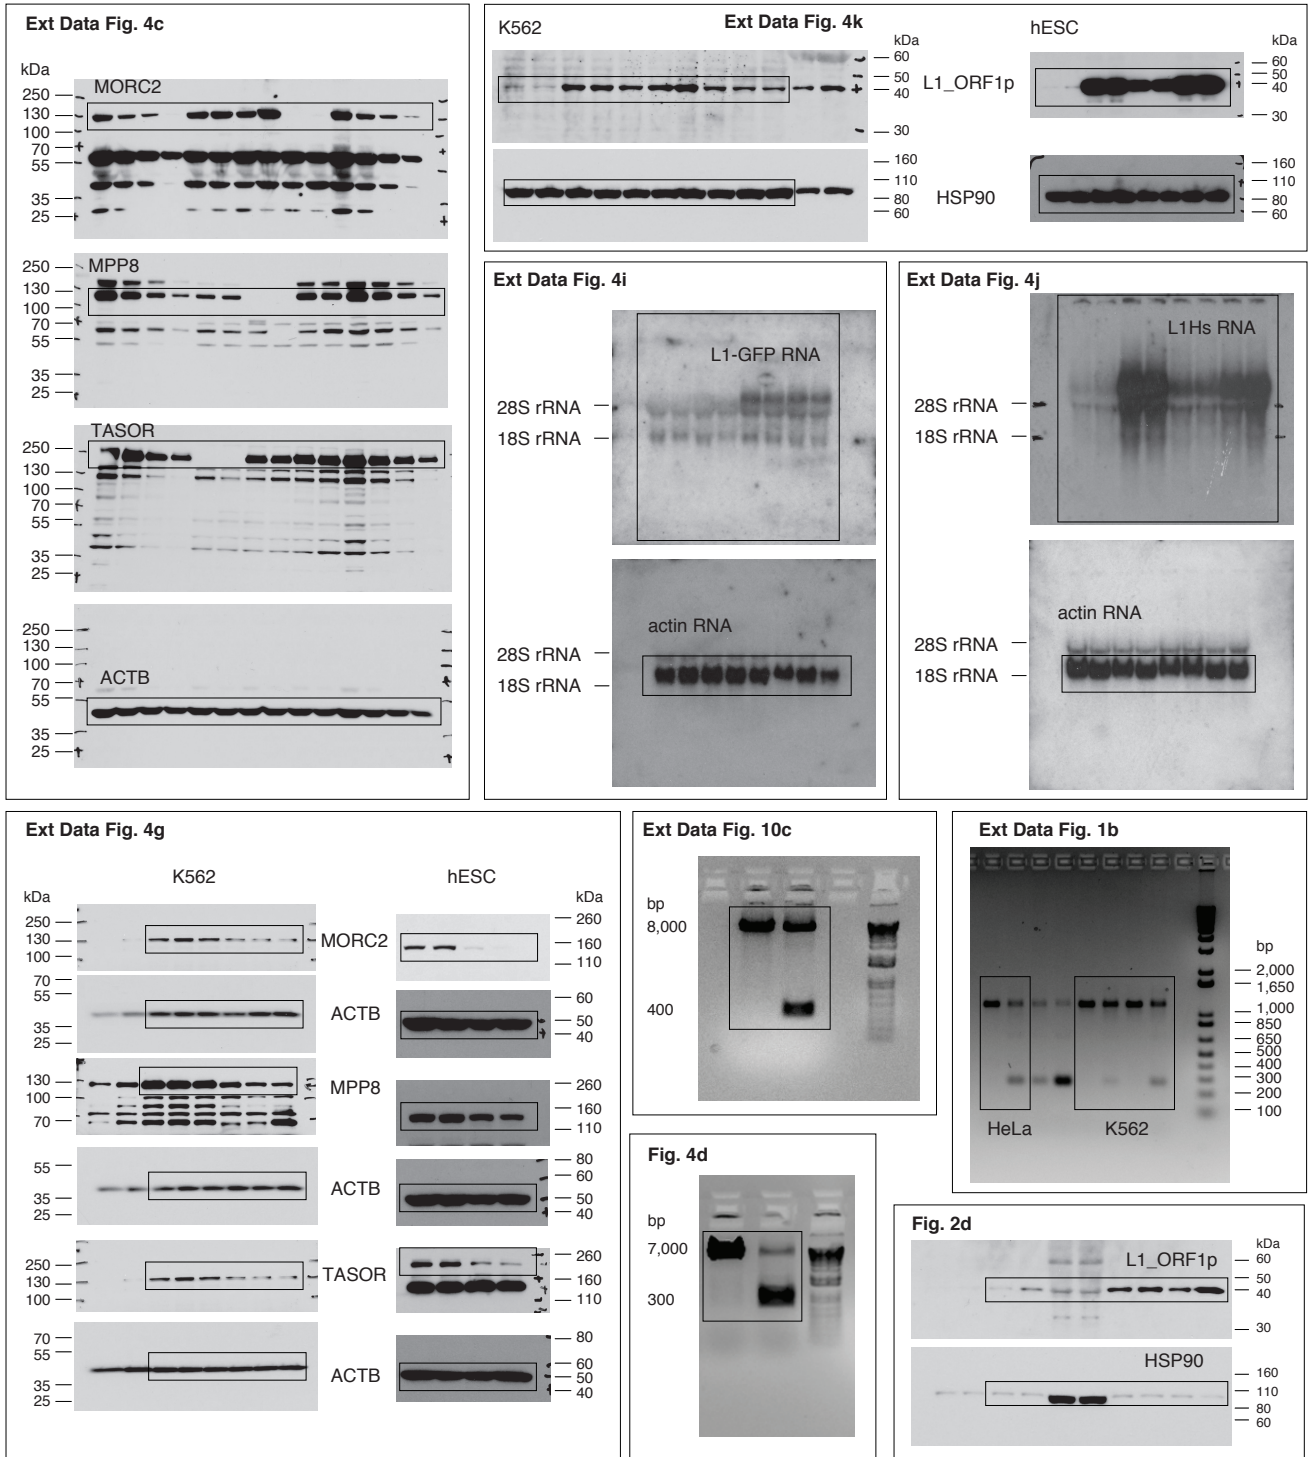

Supplement: NIHMS923470-supplement-supp_figure.pdf [file NIHMS923470-supplement-supp_figure.pdf]
